# Supplementary material for: Examination of the parameters controlling the triple oxygen isotope composition of grass leaf water and phytoliths at a Mediterranean site: a model–data approach
Source: Copernicus journal article supplement (doi:10.5194/bg-20-2161-2023), 2023-06-15
Supplement: Supplementary file 1 [file bg-20-2161-2023-supplement.zip]

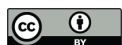

*Supplement of*

**Examination of the parameters controlling the triple oxygen isotope composition of grass leaf water and phytoliths at a Mediterranean site: a model–data approach**

**Claudia Voigt et al.**

*Correspondence to:* Claudia Voigt (cvoigt@ual.es) and Anne Alexandre (alexandre@cerege.fr)

- bg-20-2161-2023-supplement-title-page.pdf
- TableS1.xls
- TableS2.xls
- TableS3.xls
- TableS4.xls
- TableS5.xls
- TableS6.xls

The copyright of individual parts of the supplement might differ from the article licence.
