# Supplementary material for: Examination of the parameters controlling the triple oxygen isotope composition of grass leaf water and phytoliths at a Mediterranean site: a model–data approach
Source: Copernicus journal article supplement (doi:10.5194/bg-20-2161-2023), 2023-06-15
Supplement: Supplementary file 1 [file TableS1.xls]

## Sheet: Sheet1
	Table S1: Stomatal conductances on the adaxial side of individual Festuca arundinacea grass leaf blades performed on sampling days using an AP4 porometer (Delta-T Devices LTD, Cambridge, UK).
	Date	Time (UTC)	T (˚C)	gs (mmol m-2 s-1)	Light (µmol m-2 s-1)
	2021-04-04	1899-12-31 07:35:00	10.5	360	100
	2021-04-04	1899-12-31 07:37:00	10.7	110	400
	2021-04-04	1899-12-31 07:39:00	10.8	375	230
	2021-04-04	1899-12-31 07:41:00	10.8	335	85
	2021-04-04	1899-12-31 07:43:00	11.2	216	1120
	2021-04-04	1899-12-31 07:45:00	11.9	141	125
	2021-04-04	1899-12-31 07:48:00	13.2	124	1030
	2021-04-04	1899-12-31 07:51:00	14.9	530	990
	2021-04-04	1899-12-31 07:55:00	15.3	405	1140
	2021-04-04	1899-12-31 07:57:00	16.3	340	1040
	2021-04-04	1899-12-31 09:06:00	16.4	232	1280
	2021-04-04	1899-12-31 09:10:00	14.1	305	830
	2021-04-04	1899-12-31 09:11:00	14.9	300	1300
	2021-04-04	1899-12-31 09:13:00	15.3	272	1140
	2021-04-04	1899-12-31 09:15:00	15.7	274	1020
	2021-04-04	1899-12-31 09:17:00	16.3	370	1490
	2021-04-04	1899-12-31 09:19:00	17.5	405	1500
	2021-04-04	1899-12-31 09:23:00	19.1	415	890
	2021-04-04	1899-12-31 09:34:00	17.7	530	1400
	2021-04-04	1899-12-31 11:50:00	19.7	180	1340
	2021-04-04	1899-12-31 11:52:00	20.3	455	1370
	2021-04-04	1899-12-31 11:53:00	20	166	610
	2021-04-04	1899-12-31 11:54:00	21	186	1560
	2021-04-04	1899-12-31 11:58:00	22.1	142	425
	2021-04-04	1899-12-31 12:01:00	20.9	160	305
	2021-04-04	1899-12-31 12:05:00	19.2	188	360
	2021-04-04	1899-12-31 12:13:00	18	1030	410
	2021-04-04	1899-12-31 12:15:00	17.8	268	480
	2021-04-04	1899-12-31 12:17:00	17.7	670	680
	2021-04-04	1899-12-31 14:35:00	17.6	300	190
	2021-04-04	1899-12-31 14:37:00	17	125	200
	2021-04-04	1899-12-31 14:40:00	16.7	208	210
	2021-04-04	1899-12-31 14:41:00	16.3	119	220
	2021-04-04	1899-12-31 14:43:00	15.7	113	200
	2021-04-04	1899-12-31 14:44:00	15.5	115	190
	2021-04-04	1899-12-31 14:46:00	15.3	75	210
	2021-04-04	1899-12-31 14:48:00	14.8	95	180
	2021-04-04	1899-12-31 14:50:00	14.4	95	100
	2021-04-04	1899-12-31 14:52:00	14.2	120	170
	2021-04-04	1899-12-31 14:54:00	13.7	72	140
	2021-04-04	1899-12-31 14:55:00	13.5	129	130
	2021-04-04	1899-12-31 15:51:00	13.5	132	145
	2021-04-04	1899-12-31 15:52:00	13.2	22	135
	2021-04-04	1899-12-31 15:54:00	12.9	158	160
	2021-04-04	1899-12-31 15:55:00	12.7	130	155
	2021-04-04	1899-12-31 15:56:00	12.5	119	120
	2021-04-04	1899-12-31 15:57:00	12.3	108	140
	2021-04-04	1899-12-31 16:00:00	12.2	104	150
	2021-04-04	1899-12-31 16:01:00	11.9	135	125
	2021-04-04	1899-12-31 16:02:00	11.5	165	155
	2021-05-03	1899-12-31 07:38:00	12.3	248	620
	2021-05-03	1899-12-31 07:40:00	13.3	360	375
	2021-05-03	1899-12-31 07:44:00	13.8	340	100
	2021-05-03	1899-12-31 07:46:00	13.4	530	250
	2021-05-03	1899-12-31 07:48:00	13.1	272	180
	2021-05-03	1899-12-31 07:51:00	13.3	320	540
	2021-05-03	1899-12-31 07:54:00	13.8	445	350
	2021-05-03	1899-12-31 07:56:00	14.2	380	200
	2021-05-03	1899-12-31 07:57:00	14.1	270	850
	2021-05-03	1899-12-31 08:00:00	14.3	278	520
	2021-05-03	1899-12-31 08:02:00	14	540	860
	2021-05-03	1899-12-31 08:25:00	14.3	228	105
	2021-05-03	1899-12-31 08:28:00	14.6	560	190
	2021-05-03	1899-12-31 08:30:00	14.7	204	1090
	2021-05-03	1899-12-31 08:31:00	15.1	274	100
	2021-05-03	1899-12-31 08:33:00	14.9	131	790
	2021-05-03	1899-12-31 08:35:00	15.3	234	230
	2021-05-03	1899-12-31 08:37:00	15.3	186	175
	2021-05-03	1899-12-31 08:39:00	15.4	355	125
	2021-05-03	1899-12-31 08:41:00	15.4	147	115
	2021-05-03	1899-12-31 08:43:00	15.6	320	640
	2021-05-03	1899-12-31 08:45:00	16.3	280	570
	2021-05-03	1899-12-31 08:50:00	17.3	425	1150
	2021-05-03	1899-12-31 08:52:00	17.7	310	185
	2021-05-03	1899-12-31 09:36:00	16.5	48.5	65
	2021-05-03	1899-12-31 09:28:00	16.6	106	65
	2021-05-03	1899-12-31 09:40:00	16.9	520	1500
	2021-05-03	1899-12-31 09:41:00	18.1	112	85
	2021-05-03	1899-12-31 09:43:00	17.9	72	80
	2021-05-03	1899-12-31 09:44:00	17.9	138	1800
	2021-05-03	1899-12-31 09:45:00	18	54	350
	2021-05-03	1899-12-31 09:47:00	18.1	155	234
	2021-05-03	1899-12-31 10:40:00	21.5	55	50
	2021-05-03	1899-12-31 10:42:00	20.9	149	70
	2021-05-03	1899-12-31 10:44:00	20.2	56	80
	2021-05-03	1899-12-31 10:46:00	19.7	45	100
	2021-05-03	1899-12-31 10:48:00	19.3	38	90
	2021-05-03	1899-12-31 10:51:00	19.1	103	100
	2021-05-03	1899-12-31 10:53:00	19	75	165
	2021-05-03	1899-12-31 10:55:00	19	163	510
	2021-05-03	1899-12-31 10:57:00	19.3	106	250
	2021-05-03	1899-12-31 10:58:00	19.5	92	75
	2021-05-03	1899-12-31 12:29:00	21.6	286	135
	2021-05-03	1899-12-31 12:31:00	21.7	214	105
	2021-05-03	1899-12-31 12:33:00	21.8	345	60
	2021-05-03	1899-12-31 12:35:00	21.5	660	750
	2021-05-03	1899-12-31 12:36:00	21.9	560	345
	2021-05-03	1899-12-31 12:39:00	21.8	167	345
	2021-05-03	1899-12-31 12:42:00	21.5	164	125
	2021-05-03	1899-12-31 12:44:00	21.3	234	500
	2021-05-03	1899-12-31 12:46:00	21.4	415	175
	2021-05-03	1899-12-31 12:47:00	21.2	194	115
	2021-05-03	1899-12-31 13:45:00	21.9	172	204
	2021-05-03	1899-12-31 13:47:00	21.7	49	330
	2021-05-03	1899-12-31 13:48:00	21.8	165	1300
	2021-05-03	1899-12-31 13:50:00	21.7	163	230
	2021-05-03	1899-12-31 13:52:00	21.4	119	90
	2021-05-03	1899-12-31 13:53:00	21.1	276	80
	2021-05-03	1899-12-31 13:55:00	20.9	194	284
	2021-05-03	1899-12-31 13:57:00	20.9	120	90
	2021-05-03	1899-12-31 13:59:00	21.4	320	165
	2021-05-03	1899-12-31 14:01:00	21.5	137	120
	2021-05-03	1899-12-31 14:03:00	21.1	385	80
	2021-05-03	1899-12-31 14:04:00	21	230	870
	2021-05-03	1899-12-31 14:06:00	21	290	100
	2021-05-03	1899-12-31 14:07:00	21	117	105
	2021-05-03	1899-12-31 14:09:00	20.9	570	640
	2021-05-03	1899-12-31 14:10:00	20.7	360	290
	2021-05-03	1899-12-31 15:30:00	20.6	37.5	65
	2021-05-03	1899-12-31 15:32:00	20.4	66	65
	2021-05-03	1899-12-31 15:34:00	20.1	138	65
	2021-05-03	1899-12-31 15:36:00	20	155	85
	2021-05-03	1899-12-31 15:38:00	19.7	147	65
	2021-05-03	1899-12-31 15:39:00	19.7	248	370
	2021-05-03	1899-12-31 15:41:00	19.7	242	165
	2021-05-03	1899-12-31 15:44:00	19.3	81	85
	2021-05-03	1899-12-31 15:46:00	19.4	177	580
	2021-05-03	1899-12-31 15:48:00	19.8	71	135
	2021-05-03	1899-12-31 15:50:00	19.9	183	700
	2021-05-03	1899-12-31 15:51:00	20	101	750
	2021-05-03	1899-12-31 15:53:00	20.2	274	440
	2021-05-03	1899-12-31 15:54:00	20.3	248	330
	2021-05-03	1899-12-31 15:55:00	20.5	248	790
	2021-05-20	1899-12-31 07:31:00	–	193	–
	2021-05-20	1899-12-31 07:32:00	–	152	–
	2021-05-20	1899-12-31 07:34:00	–	114	–
	2021-05-20	1899-12-31 07:35:00	15	88	30
	2021-05-20	1899-12-31 07:36:00	–	345	320
	2021-05-20	1899-12-31 07:37:00	16	268	1200
	2021-05-20	1899-12-31 07:40:00	16.4	360	45
	2021-05-20	1899-12-31 07:41:00	16.3	91	45
	2021-05-20	1899-12-31 07:44:00	16	460	250
	2021-05-20	1899-12-31 07:48:00	16.1	78	30
	2021-05-20	1899-12-31 07:55:00	16.3	110	95
	2021-05-20	1899-12-31 08:35:00	18.2	100	25
	2021-05-20	1899-12-31 08:36:00	18.1	48	45
	2021-05-20	1899-12-31 08:38:00	18.1	147	65
	2021-05-20	1899-12-31 08:40:00	17.8	77	40
	2021-05-20	1899-12-31 08:42:00	17.9	51	25
	2021-05-20	1899-12-31 08:43:00	17.8	7	30
	2021-05-20	1899-12-31 08:45:00	17.7	274	300
	2021-05-20	1899-12-31 08:46:00	17.7	94	5
	2021-05-20	1899-12-31 08:47:00	17.7	102	30
	2021-05-20	1899-12-31 08:48:00	17.6	95	40
	2021-05-20	1899-12-31 08:49:00	18.2	248	1450
	2021-05-20	1899-12-31 08:50:00	18.6	46.5	30
	2021-05-20	1899-12-31 08:51:00	18.8	60	30
	2021-05-20	1899-12-31 10:20:00	21.5	101	60
	2021-05-20	1899-12-31 10:21:00	21.2	107	60
	2021-05-20	1899-12-31 10:23:00	20.4	90	65
	2021-05-20	1899-12-31 10:24:00	20.6	187	65
	2021-05-20	1899-12-31 10:26:00	20.3	113	105.5
	2021-05-20	1899-12-31 10:27:00	19.8	118	90
	2021-05-20	1899-12-31 10:29:00	19.7	148	75
	2021-05-20	1899-12-31 10:30:00	19.5	170	60
	2021-05-20	1899-12-31 10:32:00	19.3	110	55
	2021-05-20	1899-12-31 10:33:00	19.7	305	1200
	2021-05-20	1899-12-31 12:04:00	23.9	296	45
	2021-05-20	1899-12-31 12:06:00	23.6	610	80
	2021-05-20	1899-12-31 12:08:00	22.9	135	45
	2021-05-20	1899-12-31 12:09:00	22.8	145	30
	2021-05-20	1899-12-31 12:10:00	22.7	128	15
	2021-05-20	1899-12-31 12:11:00	22.5	315	230
	2021-05-20	1899-12-31 12:13:00	22.3	31	40
	2021-05-20	1899-12-31 12:13:00	22.2	160	30
	2021-05-20	1899-12-31 12:14:00	22.1	67	65
	2021-05-20	1899-12-31 12:16:00	22.1	192	130
	2021-05-20	1899-12-31 12:17:00	22.1	104	95
	2021-05-20	1899-12-31 13:36:00	23.4	305	180
	2021-05-20	1899-12-31 13:37:00	23.3	238	284
	2021-05-20	1899-12-31 13:39:00	23	64	160
	2021-05-20	1899-12-31 13:40:00	22.9	305	1270
	2021-05-20	1899-12-31 13:42:00	22.8	171	75
	2021-05-20	1899-12-31 13:44:00	22.7	181	145
	2021-05-20	1899-12-31 13:46:00	22.3	108	110
	2021-05-20	1899-12-31 13:48:00	22	102	90
	2021-05-20	1899-12-31 13:50:00	21.8	133	80
	2021-05-20	1899-12-31 13:51:00	21.7	315	105
	2021-05-20	1899-12-31 14:56:00	23.9	63	360
	2021-05-20	1899-12-31 14:57:00	23.6	274	55
	2021-05-20	1899-12-31 14:58:00	23.3	198	65
	2021-05-20	1899-12-31 14:59:00	23	100	50
	2021-05-20	1899-12-31 15:00:00	22.6	650	45
	2021-05-20	1899-12-31 15:01:00	22.3	228	40
	2021-05-20	1899-12-31 15:03:00	22.1	146	50
	2021-05-20	1899-12-31 15:06:00	22.6	54	40
	2021-05-20	1899-12-31 15:08:00	22.5	59	45
	2021-05-20	1899-12-31 05:09:00	22.4	265	700
	2021-05-20	1899-12-31 15:10:00	22.3	103	1340
	2021-05-20	1899-12-31 16:07:00	22.2	165	220
	2021-05-20	1899-12-31 16:08:00	21.8	470	830
	2021-05-20	1899-12-31 16:09:00	21.8	280	790
	2021-05-20	1899-12-31 16:10:00	21.6	52	280
	2021-05-20	1899-12-31 16:11:00	21.5	102	50
	2021-05-20	1899-12-31 16:12:00	21.3	246	244
	2021-05-20	1899-12-31 16:13:00	21	71	75
	2021-05-20	1899-12-31 16:14:00	20.9	129	65
	2021-05-20	1899-12-31 16:15:00	20.9	94	750
	2021-05-20	1899-12-31 16:16:00	21.1	214	610
	2021-06-14	1899-12-31 17:26:00	29.3	218	40
	2021-06-14	1899-12-31 17:28:00	29.2	132	435
	2021-06-14	1899-12-31 17:30:00	29.1	130	440
	2021-06-14	1899-12-31 17:31:00	29.1	143	264
	2021-06-14	1899-12-31 17:32:00	28.9	305	30
	2021-06-14	1899-12-31 17:34:00	29	170	115
	2021-06-14	1899-12-31 17:36:00	28.6	76	55
	2021-06-14	1899-12-31 17:37:00	28.9	58	70
	2021-06-14	1899-12-31 17:40:00	28.2	31	20
	2021-06-14	1899-12-31 17:41:00	28	182	20
	2021-06-14	1899-12-31 17:43:00	27.7	98	30
	2021-06-14	1899-12-31 18:48:00	26.7	51	5
	2021-06-14	1899-12-31 18:50:00	25.2	19.3	5
	2021-06-14	1899-12-31 18:53:00	25	27.8	5
	2021-06-14	1899-12-31 18:55:00	24.8	37	5
	2021-06-14	1899-12-31 18:56:00	24.6	13.1	5
	2021-06-14	1899-12-31 18:57:00	24.5	27.2	5
	2021-06-14	1899-12-31 18:58:00	24.5	21.2	5
	2021-06-14	1899-12-31 18:59:00	24.5	22.8	5
	2021-06-14	1899-12-31 19:00:00	24.4	11.9	5
	2021-06-14	1899-12-31 19:01:00	24.5	12.8	5
	2021-06-14	1899-12-31 20:40:00	24.3	8.4	0
	2021-06-14	1899-12-31 20:42:00	23.9	21	0
	2021-06-14	1899-12-31 20:44:00	23.4	8	0
	2021-06-14	1899-12-31 20:47:00	23.1	9.9	0
	2021-06-14	1899-12-31 20:50:00	22.8	28.2	0
	2021-06-15	1899-12-31 03:51:00	18	133	0
	2021-06-15	1899-12-31 03:53:00	17.3	14.6	0
	2021-06-15	1899-12-31 03:55:00	17.3	36	5
	2021-06-15	1899-12-31 03:58:00	16.9	24.4	5
	2021-06-15	1899-12-31 04:00:00	16.7	30.5	5
	2021-06-15	1899-12-31 04:02:00	16.6	47	5
	2021-06-15	1899-12-31 04:03:00	16.5	164	5
	2021-06-15	1899-12-31 04:04:00	16.6	51	5
	2021-06-15	1899-12-31 04:05:00	16.6	131	5
	2021-06-15	1899-12-31 04:06:00	16.6	196	5
	2021-06-15	1899-12-31 04:07:00	16.4	25.6	5
	2021-06-15	1899-12-31 04:10:00	16.7	13.3	5
	2021-06-15	1899-12-31 05:58:00	20.2	39	25
	2021-06-15	1899-12-31 05:59:00	20.3	296	25
	2021-06-15	1899-12-31 06:00:00	20.3	360	25
	2021-06-15	1899-12-31 06:03:00	20.5	17.5	30
	2021-06-15	1899-12-31 06:06:00	20.9	365	30
	2021-06-15	1899-12-31 06:08:00	21.1	194	35
	2021-06-15	1899-12-31 06:10:00	21.3	226	45
	2021-06-15	1899-12-31 06:12:00	21.7	111	35
	2021-06-15	1899-12-31 06:15:00	22.3	31	40
	2021-06-15	1899-12-31 06:17:00	22.3	45	20
	2021-06-15	1899-12-31 08:01:00	24.6	144	50
	2021-06-15	1899-12-31 08:02:00	25.6	200	45
	2021-06-15	1899-12-31 08:03:00	25.6	305	50
	2021-06-15	1899-12-31 08:05:00	25.7	40.5	50
	2021-06-15	1899-12-31 08:07:00	26.2	153	65
	2021-06-15	1899-12-31 08:09:00	26.3	77	100
	2021-06-15	1899-12-31 08:10:00	27.1	27	40
	2021-06-15	1899-12-31 08:11:00	27.6	144	45
	2021-06-15	1899-12-31 08:13:00	28.7	41.5	50
	2021-06-15	1899-12-31 08:17:00	28.2	84	45
	2021-06-15	1899-12-31 09:39:00	27.1	70	50
	2021-06-15	1899-12-31 09:40:00	27.1	44	100
	2021-06-15	1899-12-31 09:42:00	27.1	300	60
	2021-06-15	1899-12-31 09:40:00	27.1	270	105
	2021-06-15	1899-12-31 09:43:00	27.1	290	90
	2021-06-15	1899-12-31 09:45:00	27.2	232	350
	2021-06-15	1899-12-31 09:47:00	27.3	258	60
	2021-06-15	1899-12-31 09:48:00	27.2	162	50
	2021-06-15	1899-12-31 09:50:00	27.1	68	60
	2021-06-15	1899-12-31 09:52:00	27.1	350	75
	2021-06-15	1899-12-31 11:19:00	28.1	420	50
	2021-06-15	1899-12-31 11:21:00	28.1	39	45
	2021-06-15	1899-12-31 11:23:00	27.6	262	55
	2021-06-15	1899-12-31 11:24:00	27.3	500	50
	2021-06-15	1899-12-31 11:25:00	27.1	294	90
	2021-06-15	1899-12-31 11:27:00	27	355	800
	2021-06-15	1899-12-31 11:28:00	27	278	250
	2021-06-15	1899-12-31 11:29:00	27.2	137	80
	2021-06-15	1899-12-31 11:31:00	27.3	182	80
	2021-06-15	1899-12-31 11:33:00	27.4	139	75
	2021-06-15	1899-12-31 12:51:00	28.3	127	70
	2021-06-15	1899-12-31 12:52:00	28.3	280	100
	2021-06-15	1899-12-31 12:54:00	28.3	630	105
	2021-06-15	1899-12-31 12:55:00	28.4	286	130
	2021-06-15	1899-12-31 12:57:00	28.5	96	330
	2021-06-15	1899-12-31 12:59:00	28.6	475	65
	2021-06-15	1899-12-31 13:00:00	28.8	76	80
	2021-06-15	1899-12-31 13:01:00	28.9	640	105
	2021-06-15	1899-12-31 13:03:00	29.3	280	420
	2021-06-15	1899-12-31 13:05:00	29.6	320	115
	2021-06-15	1899-12-31 14:52:00	29.6	220	150
	2021-06-15	1899-12-31 14:52:00	29.5	226	80
	2021-06-15	1899-12-31 14:55:00	29.3	121	80
	2021-06-15	1899-12-31 14:56:00	29.1	228	75
	2021-06-15	1899-12-31 14:58:00	28.1	325	135
	2021-06-15	1899-12-31 14:59:00	28.5	115	90
	2021-06-15	1899-12-31 15:00:00	28.4	189	85
	2021-06-15	1899-12-31 15:01:00	28.4	272	115
	2021-06-15	1899-12-31 15:02:00	28.2	320	80
	2021-06-15	1899-12-31 15:04:00	28.1	186	60
	2021-06-15	1899-12-31 15:45:00	28.8	375	60
	2021-06-15	1899-12-31 15:46:00	28.8	144	70
	2021-06-15	1899-12-31 15:48:00	28.7	145	30
	2021-06-15	1899-12-31 15:49:00	28.7	266	35
	2021-06-15	1899-12-31 15:50:00	28.7	262	50
	2021-06-15	1899-12-31 15:51:00	28.7	320	115
	2021-06-15	1899-12-31 15:52:00	28.6	220	80
	2021-06-15	1899-12-31 15:53:00	28.5	256	90
	2021-06-15	1899-12-31 15:54:00	28.5	224	105
	2021-06-15	1899-12-31 15:55:00	28.8	210	274
	2021-06-15	1899-12-31 17:07:00	28	325	65
	2021-06-15	1899-12-31 17:08:00	28	126	130
	2021-06-15	1899-12-31 17:09:00	28	81	55
	2021-06-15	1899-12-31 17:09:00	28	104	60
	2021-06-15	1899-12-31 17:10:00	27.8	136	30
	2021-06-15	1899-12-31 17:11:00	27.7	222	30
	2021-06-15	1899-12-31 17:12:00	27.7	137	15
	2021-06-15	1899-12-31 17:13:00	27.7	248	150
	2021-06-15	1899-12-31 17:14:00	27.7	154	50
	2021-06-15	1899-12-31 17:14:00	27.7	154	115
	2021-07-22	1899-12-31 07:29:00	24.4	455	90
	2021-07-22	1899-12-31 07:30:00	25	226	860
	2021-07-22	1899-12-31 07:32:00	25.9	111	45
	2021-07-22	1899-12-31 07:33:00	26.3	69	145
	2021-07-22	1899-12-31 07:34:00	26.2	242	45
	2021-07-22	1899-12-31 07:35:00	26.1	32	55
	2021-07-22	1899-12-31 07:37:00	26.1	142	290
	2021-07-22	1899-12-31 07:39:00	26.3	153	620
	2021-07-22	1899-12-31 07:40:00	26.8	256	35
	2021-07-22	1899-12-31 07:41:00	26.8	305	40
	2021-07-22	1899-12-31 08:06:00	26	87	30
	2021-07-22	1899-12-31 08:07:00	26.1	61	40
	2021-07-22	1899-12-31 08:08:00	26.2	40	45
	2021-07-22	1899-12-31 08:10:00	26.4	50	10
	2021-07-22	1899-12-31 08:12:00	27.1	22.8	45
	2021-07-22	1899-12-31 08:13:00	27.1	169	1150
	2021-07-22	1899-12-31 08:13:00	27.2	30	240
	2021-07-22	1899-12-31 08:15:00	27.4	83	45
	2021-07-22	1899-12-31 08:15:00	27.4	212	800
	2021-07-22	1899-12-31 08:17:00	27.6	41	45
	2021-07-22	1899-12-31 09:05:00	27.3	63	25
	2021-07-22	1899-12-31 09:06:00	27.6	206	50
	2021-07-22	1899-12-31 09:08:00	27.7	220	204
	2021-07-22	1899-12-31 09:11:00	27.9	16.4	60
	2021-07-22	1899-12-31 09:11:00	28	89	50
	2021-07-22	1899-12-31 09:12:00	28	77	30
	2021-07-22	1899-12-31 09:14:00	28	57	40
	2021-07-22	1899-12-31 09:15:00	28.1	76	50
	2021-07-22	1899-12-31 09:18:00	28.3	153	35
	2021-07-22	1899-12-31 09:20:00	28.3	55	30
	2021-07-22	1899-12-31 10:06:00	30.1	66	214
	2021-07-22	1899-12-31 10:08:00	30.5	48	30
	2021-07-22	1899-12-31 10:09:00	30.2	165	45
	2021-07-22	1899-12-31 10:10:00	30.4	97	45
	2021-07-22	1899-12-31 10:12:00	30.1	90	30
	2021-07-22	1899-12-31 10:13:00	30.1	64	50
	2021-07-22	1899-12-31 10:14:00	30	320	50
	2021-07-22	1899-12-31 10:15:00	30	256	430
	2021-07-22	1899-12-31 10:16:00	30	61	80
	2021-07-22	1899-12-31 10:18:00	30.2	810	680
	2021-07-22	1899-12-31 10:19:00	30.3	154	40
	2021-07-22	1899-12-31 10:51:00	31.2	123	45
	2021-07-22	1899-12-31 10:52:00	31.2	89	45
	2021-07-22	1899-12-31 10:52:00	31.2	53	50
	2021-07-22	1899-12-31 10:54:00	31.4	61	70
	2021-07-22	1899-12-31 10:56:00	31.4	188	50
	2021-07-22	1899-12-31 10:57:00	31.4	69	45
	2021-07-22	1899-12-31 10:58:00	31.4	98	45
	2021-07-22	1899-12-31 10:59:00	31.4	90	70
	2021-07-22	1899-12-31 11:00:00	31.7	305	50
	2021-07-22	1899-12-31 11:02:00	31.8	68	65
	2021-07-22	1899-12-31 12:42:00	33.4	113	30
	2021-07-22	1899-12-31 12:43:00	33.1	74	35
	2021-07-22	1899-12-31 12:45:00	32.9	57	45
	2021-07-22	1899-12-31 12:47:00	32.8	82	230
	2021-07-22	1899-12-31 12:48:00	32.6	39.5	45
	2021-07-22	1899-12-31 12:49:00	32.5	94	50
	2021-07-22	1899-12-31 12:50:00	32.2	136	80
	2021-07-22	1899-12-31 12:51:00	32.2	220	50
	2021-07-22	1899-12-31 12:53:00	32.2	120	50
	2021-07-22	1899-12-31 12:55:00	32.3	266	500
	2021-07-22	1899-12-31 12:57:00	32.2	390	700
	2021-07-22	1899-12-31 13:22:00	32.8	142	240
	2021-07-22	1899-12-31 13:24:00	32.8	820	50
	2021-07-22	1899-12-31 13:25:00	32.5	440	50
	2021-07-22	1899-12-31 13:27:00	32.4	1190	60
	2021-07-22	1899-12-31 13:28:00	32.3	296	50
	2021-07-22	1899-12-31 13:29:00	32.2	106	60
	2021-07-22	1899-12-31 13:30:00	32.1	92	35
	2021-07-22	1899-12-31 13:32:00	32.1	51	50
	2021-07-22	1899-12-31 13:34:00	32	172	345
	2021-07-22	1899-12-31 13:35:00	32	67	40
	2021-07-22	1899-12-31 14:18:00	32.9	159	35
	2021-07-22	1899-12-31 14:20:00	33	63	30
	2021-07-22	1899-12-31 14:21:00	33.1	30	50
	2021-07-22	1899-12-31 14:22:00	33.1	84	820
	2021-07-22	1899-12-31 14:23:00	33.1	113	35
	2021-07-22	1899-12-31 14:24:00	33.3	46	45
	2021-07-22	1899-12-31 14:25:00	33.5	49	55
	2021-07-22	1899-12-31 14:26:00	33.5	240	50
	2021-07-22	1899-12-31 14:28:00	33.4	93	55
	2021-07-22	1899-12-31 14:30:00	33.1	76	65
	2021-07-22	1899-12-31 14:32:00	33.3	112	55
	2021-07-22	1899-12-31 15:29:00	32.5	124	60
	2021-07-22	1899-12-31 15:31:00	32.3	470	55
	2021-07-22	1899-12-31 15:33:00	32.1	61	55
	2021-07-22	1899-12-31 15:34:00	31.7	151	60
	2021-07-22	1899-12-31 15:35:00	31.6	192	80
	2021-07-22	1899-12-31 15:36:00	31.5	522	50
	2021-07-22	1899-12-31 15:28:00	31.4	173	100
	2021-07-22	1899-12-31 15:38:00	31.2	61	70
	2021-07-22	1899-12-31 15:40:00	31.2	44.5	800
	2021-07-22	1899-12-31 15:41:00	31.4	135	590
	2021-07-22	1899-12-31 15:42:00	31.5	114	405
	2021-07-22	1899-12-31 15:44:00	31.6	116	150
	2021-07-22	1899-12-31 16:26:00	32.1	75	40
	2021-07-22	1899-12-31 16:27:00	32	106	190
	2021-07-22	1899-12-31 16:29:00	31.7	190	50
	2021-07-22	1899-12-31 16:30:00	31.4	54	45
	2021-07-22	1899-12-31 16:31:00	31.4	67	65
	2021-07-22	1899-12-31 16:33:00	31.3	118	30
	2021-07-22	1899-12-31 16:34:00	31.4	35.5	50
	2021-07-22	1899-12-31 16:35:00	31.4	202	410
	2021-07-22	1899-12-31 16:37:00	31.4	470	175
	2021-07-22	1899-12-31 16:38:00	31.5	97	145
	2021-07-22	1899-12-31 17:10:00	32	260	150
	2021-07-22	1899-12-31 17:12:00	31.7	176	55
	2021-07-22	1899-12-31 17:13:00	31.5	41.5	25
	2021-07-22	1899-12-31 17:15:00	31.2	64	30
	2021-07-22	1899-12-31 17:16:00	30.9	154	30
	2021-07-22	1899-12-31 17:17:00	30.7	272	40
	2021-07-22	1899-12-31 17:18:00	30.6	246	120
	2021-07-22	1899-12-31 17:19:00	30.5	48	105
	2021-07-22	1899-12-31 17:20:00	30.4	191	70
	2021-07-22	1899-12-31 17:22:00	30.2	44	115
	2021-08-26	1899-12-31 09:46:00	24.5	170	35
	2021-08-26	1899-12-31 09:48:00	24.3	169	175
	2021-08-26	1899-12-31 09:49:00	24.4	24.6	55
	2021-08-26	1899-12-31 09:51:00	24.2	117	45
	2021-08-26	1899-12-31 09:52:00	24.3	178	280
	2021-08-26	1899-12-31 09:53:00	24.3	185	50
	2021-08-26	1899-12-31 09:54:00	24.3	270	40
	2021-08-26	1899-12-31 09:55:00	24.2	88	35
	2021-08-26	1899-12-31 09:57:00	24.1	114	130
	2021-08-26	1899-12-31 09:59:00	24.1	55	640
	2021-08-26	1899-12-31 10:44:00	26.8	88	120
	2021-08-26	1899-12-31 10:47:00	26.5	42.5	35
	2021-08-26	1899-12-31 10:48:00	26.2	132	35
	2021-08-26	1899-12-31 10:50:00	26.1	110	55
	2021-08-26	1899-12-31 10:51:00	26	206	50
	2021-08-26	1899-12-31 10:52:00	26.1	30	40
	2021-08-26	1899-12-31 10:54:00	26	25.8	40
	2021-08-26	1899-12-31 10:55:00	26.1	120	35
	2021-08-26	1899-12-31 10:57:00	26.2	45	35
	2021-08-26	1899-12-31 10:58:00	26.1	75	30
	2021-08-26	1899-12-31 11:46:00	26.3	104	30
	2021-08-26	1899-12-31 11:47:00	26.2	108	360
	2021-08-26	1899-12-31 11:48:00	26.1	53	35
	2021-08-26	1899-12-31 11:49:00	26.3	273	35
	2021-08-26	1899-12-31 11:50:00	26.6	75	335
	2021-08-26	1899-12-31 11:52:00	26.5	166	50
	2021-08-26	1899-12-31 11:53:00	26.4	325	45
	2021-08-26	1899-12-31 11:53:00	26.6	274	1170
	2021-08-26	1899-12-31 11:54:00	26.7	52	30
	2021-08-26	1899-12-31 11:55:00	26.9	135	240
	2021-08-26	1899-12-31 12:39:00	27.2	63	30
	2021-08-26	1899-12-31 12:41:00	27.2	168	34
	2021-08-26	1899-12-31 12:43:00	27.1	335	45
	2021-08-26	1899-12-31 12:44:00	27.2	350	1400
	2021-08-26	1899-12-31 12:45:00	27.4	228	510
	2021-08-26	1899-12-31 12:46:00	27.6	214	1430
	2021-08-26	1899-12-31 12:49:00	28.1	116	580
	2021-08-26	1899-12-31 12:51:00	28.2	90	50
	2021-08-26	1899-12-31 12:52:00	27.9	385	45
	2021-08-26	1899-12-31 12:54:00	27.7	54	60
	2021-08-26	1899-12-31 13:47:00	27.7	171	900
	2021-08-26	1899-12-31 13:48:00	27.5	43	105
	2021-08-26	1899-12-31 13:49:00	27.5	73	274
	2021-08-26	1899-12-31 13:51:00	27.7	132	300
	2021-08-26	1899-12-31 13:52:00	27.5	184	160
	2021-08-26	1899-12-31 13:53:00	27.4	365	35
	2021-08-26	1899-12-31 13:54:00	27.4	150	1490
	2021-08-26	1899-12-31 13:55:00	27.5	370	45
	2021-08-26	1899-12-31 13:56:00	27.4	107	45
	2021-08-26	1899-12-31 13:56:00	27.4	151	90
	2021-08-26	1899-12-31 14:45:00	27.7	115	470
	2021-08-26	1899-12-31 14:46:00	27.7	189	100
	2021-08-26	1899-12-31 14:47:00	27.5	116	475
	2021-08-26	1899-12-31 14:48:00	27.4	172	280
	2021-08-26	1899-12-31 14:50:00	27.3	286	1200
	2021-08-26	1899-12-31 14:51:00	27.2	149	50
	2021-08-26	1899-12-31 14:53:00	27	34	90
	2021-08-26	1899-12-31 14:54:00	26.8	119	45
	2021-08-26	1899-12-31 14:55:00	26.6	125	40
	2021-08-26	1899-12-31 14:56:00	26.6	124	35
	2021-08-26	1899-12-31 15:42:00	27.1	141	50
	2021-08-26	1899-12-31 15:43:00	27	248	843
	2021-08-26	1899-12-31 15:44:00	26.9	33	95
	2021-08-26	1899-12-31 15:45:00	26.7	90	120
	2021-08-26	1899-12-31 15:46:00	26.6	54	35
	2021-08-26	1899-12-31 15:47:00	26.5	37.5	25
	2021-08-26	1899-12-31 15:48:00	26.4	216	30
	2021-08-26	1899-12-31 15:49:00	26.1	121	370
	2021-08-26	1899-12-31 15:50:00	26.1	226	210
	2021-08-26	1899-12-31 15:52:00	26.1	70	40
	2021-08-26	1899-12-31 16:46:00	25.8	57	45
	2021-08-26	1899-12-31 16:49:00	25.4	26	30
	2021-08-26	1899-12-31 16:50:00	25.2	140	55
	2021-08-26	1899-12-31 16:51:00	25	355	20
	2021-08-26	1899-12-31 16:52:00	24.7	66	20
	2021-08-26	1899-12-31 16:53:00	24.6	24.2	20
	2021-08-26	1899-12-31 16:54:00	24.4	38	15
	2021-08-26	1899-12-31 16:56:00	24.2	61	25
	2021-08-26	1899-12-31 16:57:00	24.1	84	20
	2021-08-26	1899-12-31 16:59:00	24.1	179	25
	2021-08-26	1899-12-31 17:42:00	23.8	43	10
	2021-08-26	1899-12-31 17:43:00	23.7	52	10
	2021-08-26	1899-12-31 17:44:00	23.3	23.4	10
	2021-08-26	1899-12-31 17:45:00	23.2	58	10
	2021-08-26	1899-12-31 17:46:00	22.7	32.5	5
	2021-08-26	1899-12-31 17:47:00	22.6	15.5	10
	2021-08-26	1899-12-31 17:49:00	22.4	276	10
	2021-08-26	1899-12-31 17:51:00	22.1	16.6	10
	2021-08-26	1899-12-31 17:52:00	22.1	18.9	5
	2021-08-26	1899-12-31 17:53:00	21.9	15	5
	2021-10-27	1899-12-31 09:10:00	13.6	315	20
	2021-10-27	1899-12-31 09:11:00	13.5	222	25
	2021-10-27	1899-12-31 09:12:00	13.5	124	25
	2021-10-27	1899-12-31 09:13:00	13.4	210	30
	2021-10-27	1899-12-31 09:15:00	13.3	99	240
	2021-10-27	1899-12-31 09:16:00	13.4	164	30
	2021-10-27	1899-12-31 09:18:00	13.4	132	25
	2021-10-27	1899-12-31 09:19:00	13.4	181	25
	2021-10-27	1899-12-31 09:20:00	13.3	132	40
	2021-10-27	1899-12-31 09:23:00	13.2	238	75
	2021-10-27	1899-12-31 10:12:00	14.8	78	25
	2021-10-27	1899-12-31 10:13:00	14.8	151	30
	2021-10-27	1899-12-31 10:14:00	14.7	137	30
	2021-10-27	1899-12-31 10:15:00	14.9	222	850
	2021-10-27	1899-12-31 10:15:00	14.9	128	35
	2021-10-27	1899-12-31 10:17:00	15.1	94	30
	2021-10-27	1899-12-31 10:18:00	15.2	252	40
	2021-10-27	1899-12-31 10:19:00	15	69	30
	2021-10-27	1899-12-31 10:21:00	14.9	210	15
	2021-10-27	1899-12-31 10:22:00	14.9	222	930
	2021-10-27	1899-12-31 11:18:00	16.3	103	25
	2021-10-27	1899-12-31 11:19:00	16.3	116	25
	2021-10-27	1899-12-31 11:20:00	16.3	80	30
	2021-10-27	1899-12-31 11:21:00	16.3	62	30
	2021-10-27	1899-12-31 11:22:00	16.2	149	85
	2021-10-27	1899-12-31 11:24:00	16.1	144	120
	2021-10-27	1899-12-31 11:25:00	16.1	88	35
	2021-10-27	1899-12-31 11:26:00	16.1	109	30
	2021-10-27	1899-12-31 11:26:00	16.1	185	45
	2021-10-27	1899-12-31 11:27:00	16.2	90	145
	2021-10-27	1899-12-31 12:10:00	17.7	101	55
	2021-10-27	1899-12-31 12:11:00	17.7	98	70
	2021-10-27	1899-12-31 12:11:00	17.5	101	40
	2021-10-27	1899-12-31 12:12:00	17.5	82	30
	2021-10-27	1899-12-31 12:14:00	17.5	59	35
	2021-10-27	1899-12-31 12:14:00	17.5	112	240
	2021-10-27	1899-12-31 12:16:00	17.5	193	40
	2021-10-27	1899-12-31 12:17:00	17.5	47	40
	2021-10-27	1899-12-31 12:18:00	17.5	99	570
	2021-10-27	1899-12-31 12:20:00	18.1	108	60
	2021-10-27	1899-12-31 13:47:00	18	163	90
	2021-10-27	1899-12-31 13:48:00	18.2	142	60
	2021-10-27	1899-12-31 13:49:00	18.3	135	105
	2021-10-27	1899-12-31 13:50:00	18.3	165	60
	2021-10-27	1899-12-31 13:51:00	18.3	220	135
	2021-10-27	1899-12-31 13:51:00	18.3	114	425
	2021-10-27	1899-12-31 13:53:00	18.4	226	740
	2021-10-27	1899-12-31 13:53:00	18.1	320	75
	2021-10-27	1899-12-31 13:54:00	18.1	125	70
	2021-10-27	1899-12-31 13:56:00	18.1	108	40
	2021-10-27	1899-12-31 14:51:00	17.7	92	30
	2021-10-27	1899-12-31 14:51:00	17.7	64	35
	2021-10-27	1899-12-31 14:52:00	17.5	158	30
	2021-10-27	1899-12-31 14:53:00	17.5	90	65
	2021-10-27	1899-12-31 14:54:00	17.5	164	244
	2021-10-27	1899-12-31 14:55:00	17.4	95	30
	2021-10-27	1899-12-31 14:56:00	17.2	144	35
	2021-10-27	1899-12-31 14:57:00	17.1	123	70
	2021-10-27	1899-12-31 14:58:00	17.1	121	20
	2021-10-27	1899-12-31 14:59:00	17	69	150
	2021-10-27	1899-12-31 15:51:00	16.3	50	15
	2021-10-27	1899-12-31 15:52:00	16.3	42.5	5
	2021-10-27	1899-12-31 15:53:00	16.3	72	15
	2021-10-27	1899-12-31 15:54:00	16.3	61	10
	2021-10-27	1899-12-31 15:56:00	15.9	224	10
	2021-10-27	1899-12-31 15:57:00	15.8	160	10
	2021-10-27	1899-12-31 15:58:00	15.7	47	15
	2021-10-27	1899-12-31 15:59:00	15.4	47	10
	2021-10-27	1899-12-31 16:00:00	15.6	124	10
	2021-10-27	1899-12-31 16:01:00	15.5	107	10
	2021-11-23	1899-12-31 08:35:00	9.1	131	65
	2021-11-23	1899-12-31 08:36:00	9.3	149	65
	2021-11-23	1899-12-31 08:39:00	9.3	195	60
	2021-11-23	1899-12-31 08:40:00	9.2	218	45
	2021-11-23	1899-12-31 08:42:00	9	254	65
	2021-11-23	1899-12-31 08:43:00	9	212	45
	2021-11-23	1899-12-31 08:45:00	9.1	305	90
	2021-11-23	1899-12-31 08:46:00	9.1	365	85
	2021-11-23	1899-12-31 08:48:00	9.2	258	90
	2021-11-23	1899-12-31 08:50:00	9.2	250	90
	2021-11-23	1899-12-31 09:50:00	11.4	150	150
	2021-11-23	1899-12-31 09:52:00	11.6	45	194
	2021-11-23	1899-12-31 09:53:00	11.6	310	126
	2021-11-23	1899-12-31 09:55:00	11.8	340	85
	2021-11-23	1899-12-31 09:58:00	11.7	216	65
	2021-11-23	1899-12-31 10:00:00	11.6	72	224
	2021-11-23	1899-12-31 10:02:00	12.3	140	90
	2021-11-23	1899-12-31 10:04:00	12.6	148	155
	2021-11-23	1899-12-31 10:06:00	12.8	228	340
	2021-11-23	1899-12-31 10:08:00	13.5	60	270
	2021-11-23	1899-12-31 11:22:00	14.5	350	250
	2021-11-23	1899-12-31 11:23:00	14.4	90	180
	2021-11-23	1899-12-31 11:25:00	14.5	305	70
	2021-11-23	1899-12-31 11:26:00	14.6	133	90
	2021-11-23	1899-12-31 11:26:00	14.7	212	135
	2021-11-23	1899-12-31 11:28:00	15	199	680
	2021-11-23	1899-12-31 11:28:00	15	94	80
	2021-11-23	1899-12-31 11:29:00	15.3	171	800
	2021-11-23	1899-12-31 11:30:00	15.6	126	1290
	2021-11-23	1899-12-31 11:30:00	16.6	230	315
	2021-11-23	1899-12-31 13:04:00	18.1	137	95
	2021-11-23	1899-12-31 13:05:00	17.9	89	90
	2021-11-23	1899-12-31 13:06:00	17.6	137	110
	2021-11-23	1899-12-31 13:06:00	17	113	60
	2021-11-23	1899-12-31 13:07:00	16.8	140	80
	2021-11-23	1899-12-31 13:08:00	16.6	128	100
	2021-11-23	1899-12-31 13:09:00	16	150	65
	2021-11-23	1899-12-31 13:10:00	15.8	116	70
	2021-11-23	1899-12-31 13:11:00	15.6	100	70
	2021-11-23	1899-12-31 13:12:00	15.4	81	80
	2021-11-23	1899-12-31 13:47:00	15.2	165	90
	2021-11-23	1899-12-31 13:48:00	15.3	180	110
	2021-11-23	1899-12-31 13:49:00	15.1	158	120
	2021-11-23	1899-12-31 13:50:00	14.9	274	90
	2021-11-23	1899-12-31 13:51:00	14.7	200	80
	2021-11-23	1899-12-31 13:52:00	14.5	210	90
	2021-11-23	1899-12-31 13:53:00	14.4	147	85
	2021-11-23	1899-12-31 13:53:00	14.4	148	85
	2021-11-23	1899-12-31 13:55:00	14.2	189	75
	2021-11-23	1899-12-31 13:56:00	14	274	65
	2021-11-23	1899-12-31 15:08:00	13.4	152	55
	2021-11-23	1899-12-31 15:09:00	13.4	228	55
	2021-11-23	1899-12-31 15:10:00	13.1	274	45
	2021-11-23	1899-12-31 15:11:00	12.9	109	45
	2021-11-23	1899-12-31 15:13:00	12.8	153	40
	2021-11-23	1899-12-31 15:15:00	12.6	238	45
	2021-11-23	1899-12-31 15:15:00	12.5	115	40
	2021-11-23	1899-12-31 15:16:00	12.4	222	45
	2021-11-23	1899-12-31 15:18:00	12.1	228	40
	2021-11-23	1899-12-31 15:19:00	12.2	109	45
