# Supplementary material for: Examination of the parameters controlling the triple oxygen isotope composition of grass leaf water and phytoliths at a Mediterranean site: a model–data approach
Source: Copernicus journal article supplement (doi:10.5194/bg-20-2161-2023), 2023-06-15
Supplement: Supplementary file 2 [file TableS2.xls]

## Sheet: Sheet1
	Table S2: Minimum, maximum and mean Festuca arundinacea leaf temperatures of eight leaf blades measured in hourly intervals on individual leaves on sampling days using an Optris CT IR thermometer (Optris GmbH, Berlin, Germany). N = number of measurements
	Date	Time (UTC)	TMIN (ºC)	TMAX (ºC)	TMEAN (ºC)	N
	2021-06-14	1899-12-31 17:54:00	23.5	25.7	24.6625	8
	2021-06-14	1899-12-31 18:28:00	23.7	25.2	24.55	8
	2021-06-14	1899-12-31 19:37:00	21.7	23.2	22.3875	8
	2021-06-14	1899-12-31 21:34:00	19.1	20.5	19.7	8
	2021-06-15	1899-12-31 03:07:00	12.7	13.6	13.25	8
	2021-06-15	1899-12-31 04:37:00	12.6	13.7	12.975	8
	2021-06-15	1899-12-31 06:15:00	20.6	22.2	21.3375	8
	2021-06-15	1899-12-31 07:50:00	23.2	24.6	23.7375	8
	2021-06-15	1899-12-31 09:19:00	24.7	26.6	25.75	8
	2021-06-15	1899-12-31 10:57:00	23.6	26.9	24.625	8
	2021-06-15	1899-12-31 12:28:00	25.9	28	27.025	8
	2021-06-15	1899-12-31 13:54:00	23.6	26.1	25.3375	8
	2021-06-15	1899-12-31 15:24:00	24.8	26.7	25.6	8
	2021-06-15	1899-12-31 16:51:00	24.7	25.5	25.0375	8
	2021-07-22	1899-12-31 06:53:00	22.6	25.3	23.875	8
	2021-07-22	1899-12-31 07:41:00	23.4	26.5	24.6125	8
	2021-07-22	1899-12-31 08:44:00	25.1	27.6	26.5625	8
	2021-07-22	1899-12-31 09:43:00	26.8	30	28.325	8
	2021-07-22	1899-12-31 10:39:00	27.8	29.8	28.7375	8
	2021-07-22	1899-12-31 12:00:00	–	–	–	–
	2021-07-22	1899-12-31 13:10:00	–	–	–	–
	2021-07-22	1899-12-31 14:10:00	–	–	–	–
	2021-07-22	1899-12-31 15:00:00	30.4	32.8	31.9125	8
	2021-07-22	1899-12-31 16:04:00	28.2	30.4	29.225	8
	2021-07-22	1899-12-31 17:00:00	26.2	29.6	28.25	8
	2021-08-26	1899-12-31 07:32:00	19.6	25.1	21.4125	8
	2021-08-26	1899-12-31 08:37:00	19.4	23.5	21.275	8
	2021-08-26	1899-12-31 09:57:00	22.5	25.1	23.7375	8
	2021-08-26	1899-12-31 10:56:00	24	25.3	24.55	8
	2021-08-26	1899-12-31 11:52:00	24.1	25.6	24.6625	8
	2021-08-26	1899-12-31 12:52:00	23	24.3	23.575	8
	2021-08-26	1899-12-31 13:34:00	25.5	27.4	26.3875	8
	2021-08-26	1899-12-31 14:29:00	25.4	27.6	26.4375	8
	2021-08-26	1899-12-31 15:26:00	22.7	23.5	23.0375	8
	2021-08-26	1899-12-31 16:29:00	21.6	22.7	22.325	8
	2021-08-26	1899-12-31 17:24:00	20.6	21.4	21.0375	8
	2021-10-27	1899-12-31 06:45:00	4.2	5.7	4.8625	8
	2021-10-27	1899-12-31 07:50:00	7.8	8.3	8.0875	8
	2021-10-27	1899-12-31 08:45:00	9.7	10.4	10.0625	8
	2021-10-27	1899-12-31 09:50:00	11.2	13	12.05	8
	2021-10-27	1899-12-31 10:50:00	13.1	14.6	13.65	8
	2021-10-27	1899-12-31 11:50:00	15.2	16.8	15.7125	8
	2021-10-27	1899-12-31 13:30:00	16.8	18.2	17.4625	8
	2021-10-27	1899-12-31 14:25:00	15.5	16.8	16.025	8
	2021-10-27	1899-12-31 15:30:00	12.6	14.3	13.2375	8
	2021-10-27	1899-12-31 16:30:00	9.3	10.3	9.725	8
	2021-11-23	1899-12-31 08:00:00	2.1	4.3	3.15	8
	2021-11-23	1899-12-31 08:55:00	6.6	8.1	7.075	8
	2021-11-23	1899-12-31 10:17:00	9.9	12.1	10.625	8
	2021-11-23	1899-12-31 11:17:00	12.1	15.7	13.675	8
	2021-11-23	1899-12-31 12:24:00	9.2	11.7	10.3125	8
	2021-11-23	1899-12-31 13:30:00	9.8	11.6	10.475	8
	2021-11-23	1899-12-31 14:30:00	8.8	9.8	9.375	8
	2021-11-23	1899-12-31 15:30:00	7.2	8.7	7.8625	8
