# Supplementary material for: Examination of the parameters controlling the triple oxygen isotope composition of grass leaf water and phytoliths at a Mediterranean site: a model–data approach
Source: Copernicus journal article supplement (doi:10.5194/bg-20-2161-2023), 2023-06-15
Supplement: Supplementary file 3 [file TableS3.xls]

## Sheet: Sheet1
	Table S3: Comparison between measurements of water laboratory standards at CEREGE using a cavity-ring-down spectrometer (CRDS) and the University of Cologne using a dual-inlet isotope ratio mass spectrometer (IRMS).
		University of Cologne (UoC) (IRMS, MAT253)					CEREGE (CER) (CRDS, Picarro L2140-i)					DIFFERENCE UoC – CER
	laboratory water standard	δ17O (‰)	δ18O (‰)	δ2H (‰)	17O-excess (per meg)	d-excess (‰)	δ17O (‰)	δ18O (‰)	δ2H (‰)	17O-excess (per meg)	d-excess (‰)	δ17O (‰)	δ18O (‰)	δ2H (‰)	17O-excess (per meg)	d-excess (‰)
	CER_ICE	-14.275	-26.921	-203.927	31.206	11.4407	-14.2404	-26.8485	-203.76	27.0077	11.0284	-0.0346114	-0.072444	-0.167285	4.19824	0.412267
	CER_TAP	-4.6163	-8.76192	-59.0443	19.6939	11.051	-4.53973	-8.63819	-59.2434	30.7174	9.86213	-0.0765734	-0.123727	0.199092	-11.0234	1.18891
	CER_SEA	-0.12583	-0.224198	1.07966	-7.44804	2.87324	-0.142064	-0.267516	0.472642	-0.806612	2.61277	0.0162345	0.0433185	0.607018	-6.64142	0.26047
	UoC_NEEM	-13.8015	-26.0445	-201.993	36.0705	6.36317	-13.616	-25.7228	-200.935	49.7822	4.84694	-0.185497	-0.321686	-1.05725	-13.7118	1.51623
	UoC_Pitztal	-7.31652	-13.8594	-104.237	25.5379	6.6381	-7.23541	-13.7167	-104.274	30.809	5.45933	-0.0811048	-0.142754	0.0367278	-5.27117	1.17876
	UoC_BW	9.44748	18.1345	23.8697	-86.1147	-121.206	9.47879	18.1209	23.5068	-48	-121.46	-0.0313099	0.0136653	0.362927	–	0.253605
