# Supplementary material for: Examination of the parameters controlling the triple oxygen isotope composition of grass leaf water and phytoliths at a Mediterranean site: a model–data approach
Source: Copernicus journal article supplement (doi:10.5194/bg-20-2161-2023), 2023-06-15
Supplement: Supplementary file 4 [file TableS4.xls]

## Sheet: Sheet1
	Table S4: 2021 monthly and annual means of atmospheric temperature measured at 60 cm height next to the grass plot (Tair), precipitation amount (P), amount-weighted isotope composition of precipitation (subscript P) and the isotope composition of atmospheric water vapor measured at 40 cm height above the grass plot (subscript V). Atmospheric water vapor values estimated from the equilibrium assum…
		Tair (˚C)	P (mm)	δ17OP (‰)		δ17OV,eq (‰)	δ17OV (‰)		δ18OP (‰)		δ18OV,eq (‰)	δ18OV (‰)		δ2HP (‰)		δ2HV,eq (‰)	δ2HV (‰)		17O-excessP (per meg)		17O-excessV,eq (per meg)	17O-excessV (per meg)		d-excessP (‰)		d-excessV,eq (‰)	d-excessV (‰)
				AV	SD	AV	AV	SD	AV	SD	AV	AV	SD	AV	SD	AV	AV	SD	AV	SD	AV	AV	SD	AV	SD	AV	AV	SD
	Jan	5.76081	53.3234	-5.44487	2.61977	-11.4054	-12.7336	2.50644	-10.3513	4.94976	-21.5334	-24.0499	4.70162	-71.1847	39.4299	-160.545	-176.894	33.8506	34.2303	11.7523	22.8668	41.2916	8.95385	11.6257	2.13421	11.7229	15.5048	4.72743
	Feb	7.15428	40.2722	-4.60364	2.11202	-10.3129	-9.28761	1.83828	-8.75418	3.98833	-19.4742	-17.5621	3.45	-60.1416	32.0632	-145.365	-127.867	27.1705	28.2942	6.61724	17.4206	25.8652	6.37447	9.8919	3.01128	10.4287	12.6302	4.72308
	Mar	8.03802	9.13583	-2.19918	–	-7.9151	-9.05479	1.55466	-4.21718	–	-14.973	-17.1218	2.90998	-21.7577	–	-110.312	-124.438	21.5434	29.7789	–	18.9188	23.7065	7.18254	11.9798	–	9.47145	12.5358	3.16802
	Apr	9.35746	124.918	-4.21264	0.509158	-9.85732	-8.80144	1.16815	-8.01298	0.969259	-18.6159	-16.6549	2.19759	-52.1188	7.28567	-136.705	-119.338	16.0035	26.3544	6.40174	15.6083	28.29	10.1174	11.985	3.35105	12.222	13.901	4.23449
	May	13.2164	82.4089	-3.02407	0.523487	-8.48069	-8.23108	1.09725	-5.7771	0.98932	-16.0385	-15.5761	2.06442	-33.3123	10.9845	-115.526	-114.027	15.4523	30.4987	1.58108	20.1241	24.5757	5.28784	12.9045	6.0351	12.7824	10.5814	3.29198
	Jun	19.9028	12.8647	-2.94383	1.284	-8.07501	-7.45841	1.17216	-5.61624	2.43867	-15.2678	-14.1227	2.21374	-37.1036	17.7001	-112.259	-102.198	16.3197	25.5602	6.54765	15.8067	24.3303	7.54758	7.82638	2.89648	9.88365	10.7844	2.1347
	Jul	21.8383	21.267	-4.01817	1.33583	-9.05665	-8.28522	1.15038	-7.61431	2.52842	-17.0831	-15.6758	2.16532	-62.3155	19.5594	-133.751	-114.474	15.984	9.4762	3.30279	-0.111036	23.3589	4.63878	-1.40097	1.56432	2.91364	10.9328	2.04109
	Aug	21.142	57.5945	-3.70904	0.416943	-8.76777	-8.22859	1.14092	-7.02316	0.803131	-16.5326	-15.5742	2.14769	-47.9385	6.64648	-120.85	-112.129	15.98	5.37654	8.68696	-4.24632	25.9655	5.72181	8.24679	0.22143	11.4106	12.4645	1.92703
	Sep	17.8514	69.917	-2.98228	0.771559	-8.17419	-8.065	0.937244	-5.66732	1.4705	-15.4328	-15.2725	1.766	-36.1782	7.68339	-112.665	-109.586	13.0714	14.1252	8.08849	4.25549	28.8306	4.25843	9.16044	4.43752	10.7974	12.5943	2.14652
	Oct	11.8535	85.0191	-1.71727	0.134732	-7.1998	-8.00399	0.654486	-3.30325	0.258657	-13.6254	-15.1677	1.22945	-8.21445	1.47084	-92.9618	-106.13	9.08405	28.2578	2.09042	17.8474	33.9313	8.92259	18.2115	0.598415	16.0416	15.2115	2.62959
	Nov	6.97203	84.5012	-4.49296	0.880929	-10.2118	-10.2465	1.29813	-8.56894	1.66012	-19.3078	-19.3632	2.44607	-55.7713	15.4518	-141.574	-140.308	18.8272	40.8126	6.36118	29.9219	25.6041	10.8812	12.7802	2.88555	12.8884	14.5975	2.65098
	Dec	5.20374	88.3751	-5.86235	1.33325	-11.6492	-11.9872	1.47056	-11.1296	2.5	-21.9827	-22.6407	2.76148	-78.4819	22.1345	-163.731	-166.395	20.527	29.77	5.7682	18.7341	33.2972	6.64718	10.5548	2.06686	12.1302	14.7312	2.74419
	annual mean	12.7313	729.597	-4.23403	1.52318	-9.73276	-9.19862	1.65168	-8.05475	2.88108	-18.384	-17.3985	3.10545	-52.4552	24.1993	-134.035	-126.149	23.6953	28.8961	10.9648	16.6465	28.2539	5.38948	11.9829	3.53702	13.0371	13.0391	1.74102
