# Supplementary material for: Examination of the parameters controlling the triple oxygen isotope composition of grass leaf water and phytoliths at a Mediterranean site: a model–data approach
Source: Copernicus journal article supplement (doi:10.5194/bg-20-2161-2023), 2023-06-15
Supplement: Supplementary file 5 [file TableS5.xls]

## Sheet: Sheet1
	Table S5: Steady-state isotope composition of bulk leaf water (subscript leaf,ss) observed and predicted for midday samples collected between May and November 2021 and for the 24-hour sampling from 14-15 June 2021. All model input parameters were measured. Modelling is based on a two-pool mixing (Eq. (4), main text) between unevaporated water in the leaf veins, assumed to be equal to the source w…
		OBSERVED																												CALCULATED						PREDICTED C-G MODEL										PREDICTED C-G MODEL AND TWO-POOL MIXING EQUATION
	Sample ID	TEMPERATURE AND RELATIVE HUMIDITY*						F. ARUNDINACEA STOMATAL & BOUNDARY LAYER CONDUCTANCE*		isotope composition of SOURCE WATER = IRRIGATION WATER										isotope composition of ATMOSPHERIC WATER VAPOR										equilbrium fractionation factors			diffusive fractionation factors			PREDICTED isotope composition of LEAF WATER AT EVAPORATIVE SITES (Eq. (2), main text)											PREDICTED isotope composition of BULK LEAF WATER (TWO-POOL MIXING MODEL) (Eq. (4), main text)
		Tair (˚C)	Tplot (˚C)	RH (%)	ea (kPa)	ei (kPa)	h (%)	gs (mol m-2 s-1)	gb (mol m-2 s-1)	17RS	δ17OS (‰)	δ'17OS (‰)	18RS	δ18OS (‰)	δ'18OS (‰)	2RS	δ2HS (‰)	17O-excessS (per meg)	d-excessS (‰)	17RV	δ17OV (‰)	δ'17OV (‰)	18RV	δ18OV (‰)	δ'18OV (‰)	2RV	δ2HV (‰)	17O-excessV (per meg)	d-excessV (‰)	17⍺eq	18⍺eq	2⍺eq	17⍺diff	18⍺diff	2⍺diff	17RE	δ17OE (‰)	δ'17OE (‰)	18RE	δ18OE (‰)	δ'18OE (‰)	2RE	δ2HE (‰)	17O-excessE (per meg)	d-excessE (‰)	f	δ17Oleaf (‰)	δ'17Oleaf (‰)	δ18Oleaf (‰)
	Midday samples
	O3HP_FA_leaf_20210503_1330	17.4157	17.5184	41.9914	0.838312	2.00937	41.7201	0.0965889	3.85	0.996118	-3.88198	-3.88954	0.992602	-7.3984	-7.42591	0.951495	-48.5048	31.3428	10.6824	0.99083	-9.1704	-9.2127	0.982635	-17.3651	-17.5177	0.881813	-118.187	36.6379	20.7346	1.00528	1.01001	1.088	1.0143	1.02777	1.02479	1.00751	7.51038	7.48232	1.01456	14.5637	14.4586	1.01856	18.561	-151.834	-97.9483	0.2	5.23191	5.21827	10.1712
	O3HP_FA_leaf_20210520_1130	20.2421	18.518	35.8757	0.854571	2.13973	39.9383	0.114297	3.95	0.996118	-3.88198	-3.88954	0.992602	-7.3984	-7.42591	0.951495	-48.5048	31.3428	10.6824	0.991652	-8.34831	-8.38335	0.984189	-15.8107	-15.937	0.888186	-111.814	31.3945	14.672	1.00524	1.00992	1.08679	1.01429	1.02774	1.02476	1.00813	8.1333	8.1004	1.01576	15.7568	15.634	1.02198	21.981	-154.342	-104.074	0.2	5.73024	5.71389	11.1258
	O3HP_FA_leaf_20210722_1155	32.5964	29.9157	27.3714	1.35178	4.23987	31.8827	0.0835669	3.95	0.996118	-3.88198	-3.88954	0.992602	-7.3984	-7.42591	0.951495	-48.5048	31.3428	10.6824	0.99235	-7.64993	-7.67934	0.985498	-14.5018	-14.6079	0.899552	-100.448	33.6542	15.5659	1.00474	1.00898	1.07413	1.01432	1.0278	1.02483	1.0094	9.3973	9.35342	1.0182	18.1998	18.0362	1.02152	21.5241	-169.687	-124.074	0.2	6.74144	6.71882	13.0802
	O3HP_FA_leaf_20210826_1140	26.7014	23.6433	42.0536	1.47897	2.93139	50.4528	0.048721	3.85	0.996118	-3.88198	-3.88954	0.992602	-7.3984	-7.42591	0.951495	-48.5048	31.3428	10.6824	0.991082	-8.91822	-8.95822	0.983103	-16.8967	-17.0411	0.884935	-115.064	39.4662	20.1091	1.00501	1.00949	1.08085	1.01436	1.02788	1.0249	1.00568	5.67506	5.65902	1.01102	11.0221	10.9618	1.00481	4.81255	-128.787	-83.3639	0.2	3.76365	3.75659	7.33797
	O3HP_FA_leaf_20210827_1130	24.7707	22.5195	37.7107	1.18279	2.73875	43.1871	0.048721	3.85	0.996118	-3.88198	-3.88954	0.992602	-7.3984	-7.42591	0.951495	-48.5048	31.3428	10.6824	0.991493	-8.50694	-8.54333	0.98389	-16.1097	-16.2409	0.886565	-113.435	31.8725	15.4429	1.00506	1.00958	1.08212	1.01436	1.02788	1.0249	1.00732	7.31547	7.28884	1.01419	14.186	14.0864	1.01385	13.8475	-148.759	-99.6408	0.2	5.07598	5.06314	9.86915
	O3HP_FA_leaf_20211022_1130	17.1929	15.2356	65.1264	1.28198	1.7375	73.7833	0.106796	3.85	0.996118	-3.88198	-3.88954	0.992602	-7.3984	-7.42591	0.951495	-48.5048	31.3428	10.6824	0.99169	-8.3097	-8.34442	0.984249	-15.7506	-15.876	0.893547	-106.453	38.0906	19.5517	1.00539	1.01022	1.09083	1.01429	1.02775	1.02477	1.00196	1.95588	1.95397	1.00381	3.80992	3.80268	0.998025	-1.97513	-53.8404	-32.4545	0.2	0.788311	0.788	1.56825
	O3HP_FA_leaf_20211027_1130	16.18	14.5821	64.3457	1.18768	1.66588	71.2945	0.106796	3.85	0.996118	-3.88198	-3.88954	0.992602	-7.3984	-7.42591	0.951495	-48.5048	31.3428	10.6824	0.992317	-7.68278	-7.71244	0.985414	-14.586	-14.6934	0.900537	-99.4634	45.6828	17.2246	1.00542	1.01027	1.09166	1.01429	1.02775	1.02477	1.0029	2.90349	2.89929	1.00561	5.61033	5.59465	1.00644	6.43646	-54.687	-38.4462	0.2	1.5464	1.5452	3.00858
	O3HP_FA_leaf_20211123_1230	13.9179	11.7129	61.5929	0.98287	1.38121	71.1599	0.126543	3.95	0.996118	-3.88198	-3.88954	0.992602	-7.3984	-7.42591	0.951495	-48.5048	31.3428	10.6824	0.989074	-10.9258	-10.9859	0.979356	-20.644	-20.86	0.852942	-147.058	28.1507	18.0938	1.00556	1.01054	1.09539	1.01427	1.02771	1.02474	1.00074	0.741507	0.741233	1.00156	1.55529	1.55408	0.972872	-27.1284	-79.3218	-39.5707	0.2	-0.183191	-0.183207	-0.23545
	24-hour period
	O3HP_FA_leaf_20210614_1720	30.1192	26.4091	37.655	1.61529	3.45681	46.7276	0.0103526	3.85	0.9961	-3.89963	-3.90725	0.992572	-7.42815	-7.45588	0.951449	-48.5514	29.4507	10.8738	0.992174	-7.8258	-7.85658	0.985163	-14.8372	-14.9484	0.898539	-101.461	36.1688	17.2363	1.00489	1.00926	1.07781	1.01441	1.02797	1.02498	1.00681	6.80836	6.78529	1.0132	13.1971	13.1108	1.01248	12.483	-137.186	-93.0936	0.2	4.66677	4.65591	9.07203
	O3HP_FA_leaf_20210614_1830	26.9558	24.3036	38.4833	1.37381	3.05004	45.0424	0.0103526	3.85	0.9961	-3.89963	-3.90725	0.992572	-7.42815	-7.45588	0.951449	-48.5514	29.4507	10.8738	0.991675	-8.32474	-8.35959	0.984229	-15.7713	-15.897	0.892259	-107.741	34.022	18.4297	1.00498	1.00943	1.08011	1.01441	1.02797	1.02498	1.00698	6.98273	6.95846	1.01354	13.5432	13.4523	1.01298	12.9842	-144.369	-95.3615	0.2	4.80626	4.79474	9.34895
	O3HP_FA_leaf_20210614_1945	23.605	21.8126	43.04	1.25877	2.62334	47.9834	0.0212972	3.85	0.9961	-3.89963	-3.90725	0.992572	-7.42815	-7.45588	0.951449	-48.5514	29.4507	10.8738	0.991715	-8.28528	-8.31979	0.98431	-15.6895	-15.8139	0.891684	-108.316	29.9396	17.2001	1.00509	1.00964	1.08292	1.01439	1.02795	1.02495	1.00655	6.54945	6.5281	1.01271	12.7057	12.6257	1.01267	12.6656	-138.269	-88.9803	0.2	4.45964	4.44972	8.67896
	O3HP_FA_leaf_20210614_2135	21.4442	19.8597	40.6833	1.04348	2.3263	44.8556	0.0155494	3.85	0.9961	-3.89963	-3.90725	0.992572	-7.42815	-7.45588	0.951449	-48.5514	29.4507	10.8738	0.99129	-8.71007	-8.74822	0.983513	-16.4868	-16.6242	0.885052	-114.948	29.3785	16.9471	1.00518	1.00981	1.0852	1.0144	1.02796	1.02497	1.00704	7.03862	7.01396	1.01366	13.6569	13.5645	1.0144	14.404	-148.081	-94.8511	0.2	4.85097	4.83924	9.43988
	O3HP_FA_leaf_20210615_0315	15.085	16.003	97.15	1.67172	1.82505	91.5988	0.0127282	3.85	0.9961	-3.89963	-3.90725	0.992572	-7.42815	-7.45588	0.951449	-48.5514	29.4507	10.8738	0.993673	-6.32678	-6.34688	0.988069	-11.931	-12.0027	0.903071	-96.9287	-9.42617	-1.48074	1.00535	1.01015	1.08987	1.01441	1.02797	1.02497	1.00041	0.410834	0.41075	1.00083	0.832086	0.83174	0.990838	-9.16199	-28.4085	-15.8187	0.2	-0.451258	-0.45136	-0.819962
	O3HP_FA_leaf_20210615_0445	14.4858	15.6028	97.1083	1.60768	1.77893	90.3735	0.00307572	3.85	0.9961	-3.89963	-3.90725	0.992572	-7.42815	-7.45588	0.951449	-48.5514	29.4507	10.8738	0.993891	-6.10883	-6.12757	0.988481	-11.5191	-11.5859	0.9046	-95.3997	-10.1999	-3.24719	1.00537	1.01018	1.09037	1.01442	1.02799	1.02499	1.00084	0.835582	0.835233	1.00165	1.64552	1.64417	0.993765	-6.23486	-32.8876	-19.399	0.2	-0.111461	-0.111467	-0.169215
	O3HP_FA_leaf_20210615_0615	18.9658	19.8167	91.25	2.00794	2.3201	86.5453	0.0873874	3.85	0.9961	-3.89963	-3.90725	0.992572	-7.42815	-7.45588	0.951449	-48.5514	29.4507	10.8738	0.994204	-5.79647	-5.81333	0.989065	-10.9354	-10.9956	0.910659	-89.3415	-7.65255	-1.85844	1.00518	1.00981	1.08525	1.01431	1.02779	1.02481	1.00154	1.53585	1.53468	1.00299	2.99139	2.98693	0.997693	-2.30686	-42.4218	-26.238	0.2	0.448757	0.448656	0.907483
	O3HP_FA_leaf_20210615_0800	24.2617	23.1324	69.4042	2.11154	2.84241	74.2869	0.0751261	3.85	0.9961	-3.89963	-3.90725	0.992572	-7.42815	-7.45588	0.951449	-48.5514	29.4507	10.8738	0.993639	-6.36094	-6.38126	0.987947	-12.0528	-12.1261	0.913293	-86.7068	21.3069	9.71593	1.00503	1.00953	1.08142	1.01433	1.02782	1.02484	1.00296	2.96078	2.95641	1.00573	5.72866	5.71231	1.00484	4.83797	-59.6949	-40.9913	0.2	1.5887	1.58744	3.0973
	O3HP_FA_leaf_20210615_0930	26.8025	24.8736	66.655	2.35816	3.1558	74.7245	0.0625291	3.85	0.9961	-3.89963	-3.90725	0.992572	-7.42815	-7.45588	0.951449	-48.5514	29.4507	10.8738	0.993619	-6.38082	-6.40127	0.987902	-12.0981	-12.1719	0.914766	-85.2341	25.4726	11.5505	1.00495	1.00938	1.07949	1.01434	1.02785	1.02487	1.0028	2.8004	2.79649	1.00542	5.41618	5.40156	1.00394	3.94012	-55.5365	-39.3893	0.2	1.4604	1.45933	2.84731
	O3HP_FA_leaf_20210615_1100	27.9717	24.8696	57.8792	2.1928	3.15503	69.5015	0.0794521	3.85	0.9961	-3.89963	-3.90725	0.992572	-7.42815	-7.45588	0.951449	-48.5514	29.4507	10.8738	0.993507	-6.49278	-6.51395	0.987691	-12.3088	-12.3851	0.914502	-85.4982	25.4027	12.9719	1.00495	1.00938	1.07949	1.01432	1.02781	1.02483	1.0036	3.59635	3.5899	1.00696	6.96001	6.9359	1.00714	7.1371	-72.2555	-48.543	0.2	2.09716	2.09496	4.08238
	O3HP_FA_leaf_20210615_1230	29.7508	27.2284	50.5233	2.12191	3.62745	58.4958	0.11841	3.85	0.9961	-3.89963	-3.90725	0.992572	-7.42815	-7.45588	0.951449	-48.5514	29.4507	10.8738	0.993354	-6.64618	-6.66836	0.987398	-12.6019	-12.682	0.913274	-86.7261	27.7481	14.0895	1.00485	1.00919	1.07694	1.01428	1.02772	1.02475	1.00525	5.25114	5.2374	1.01017	10.1666	10.1152	1.01113	11.1274	-103.446	-70.2051	0.2	3.42098	3.41514	6.64762
	O3HP_FA_leaf_20210615_1400	30.7517	27.1055	43.1408	1.91886	3.60141	53.2808	0.110942	3.85	0.9961	-3.89963	-3.90725	0.992572	-7.42815	-7.45588	0.951449	-48.5514	29.4507	10.8738	0.993447	-6.55264	-6.5742	0.987572	-12.4277	-12.5055	0.913449	-86.5513	28.7185	12.8699	1.00486	1.0092	1.07707	1.01429	1.02774	1.02476	1.0062	6.19973	6.18059	1.012	11.9985	11.9271	1.01482	14.8248	-116.911	-81.1632	0.2	4.17986	4.17115	8.11317
	O3HP_FA_leaf_20210615_1530	28.0817	26.4578	62.7233	2.39161	3.46675	68.987	0.089308	3.85	0.9961	-3.89963	-3.90725	0.992572	-7.42815	-7.45588	0.951449	-48.5514	29.4507	10.8738	0.993987	-6.01348	-6.03164	0.988608	-11.3916	-11.457	0.918029	-81.9713	17.643	9.16138	1.00489	1.00926	1.07776	1.01431	1.02779	1.02481	1.00394	3.9442	3.93644	1.00763	7.63126	7.60229	1.00848	8.47705	-77.5676	-52.573	0.2	2.37543	2.37262	4.61938
	O3HP_FA_leaf_20210615_1700	27.4108	25.3436	63.44	2.32599	3.24539	71.6705	0.0775079	3.85	0.9961	-3.89963	-3.90725	0.992572	-7.42815	-7.45588	0.951449	-48.5514	29.4507	10.8738	0.993986	-6.01351	-6.03166	0.988611	-11.3894	-11.4547	0.918599	-81.4007	16.4383	9.71437	1.00493	1.00935	1.07897	1.01433	1.02781	1.02483	1.00355	3.5543	3.54799	1.00688	6.87657	6.85303	1.0084	8.40467	-70.4088	-46.6079	0.2	2.06351	2.06138	4.01563
	*averaged over 30 min before sampling
[truncated: 27 more columns]
