# Supplementary material for: Examination of the parameters controlling the triple oxygen isotope composition of grass leaf water and phytoliths at a Mediterranean site: a model–data approach
Source: Copernicus journal article supplement (doi:10.5194/bg-20-2161-2023), 2023-06-15
Supplement: Supplementary file 6 [file TableS6.xls]

## Sheet: Sheet1
	Table S6: Evolution of the bulk leaf water predicted for non-steady-state conditions during the 24-hour monitoring in hourly resolution (Eq. (6), main text). The leaf water content W was tuned to fit the observed isotope composition of leaf water (Table 1). Calculations of variables according to Table S5.
		OBSERVED																														CALCULATED						PREDICTED STEADY STATE C-G MODEL										PREDICTED STEADY STATE C-G MODEL AND TWO-POOL MIXING EQUATION
	Sample ID	TEMPERATURE AND RELATIVE HUMIDITY*							F. ARUNDINACEA STOMATAL & BOUNDARY LAYER CONDUCTANCE*			Isotope composition of SOURCE WATER = IRRIGATION WATER										Isotope composition of ATMOSPHERIC WATER VAPOR										Equilbrium fractionation factors			Diffusive fractionation factors			PREDICTED isotope composition of LEAF WATER AT EVAPORATIVE SITES											PREDICTED STEADY STATE isotope composition of BULK LEAF WATER
		Tair (˚C)	Tplot (˚C)	RH (%)	ea (kPa)	ei (kPa)	wi	h (%)	gs (mol m-2 s-1)	gb (mol m-2 s-1)	g (mol m-2 s-1)	17RS	δ17OS (‰)	δ'17OS (‰)	18RS	δ18OS (‰)	δ'18OS (‰)	2RS	δ2HS (‰)	17O-excessS (per meg)	d-excessS (‰)	17RV	δ17OV (‰)	δ'17OV (‰)	18RV	δ18OV (‰)	δ'18OV (‰)	2RV	δ2HV (‰)	17O-excessV (per meg)	d-excessV (‰)	17⍺eq	18⍺eq	2⍺eq	17⍺diff	18⍺diff	2⍺diff	17RE	δ17OE (‰)	δ'17OE (‰)	18RE	δ18OE (‰)	δ'18OE (‰)	2RE	δ2HE (‰)	17O-excessE (per meg)	d-excessE (‰)	f	17Rleaf,ss
	2021-06-14 17:00:00	30.4821	27.048	44.3762	1.94362	3.58927	0.0354233	54.1508	0.021	3.85	0.0208861	0.9961	-3.89963	-3.90725	0.992572	-7.42815	-7.45588	0.951449	-48.5514	29.4507	10.8738	0.992178	-7.82151	-7.85226	0.98517	-14.83	-14.9411	0.898612	-101.388	36.6203	17.2522	1.00486	1.00921	1.07713	1.0144	1.02795	1.02495	1.00541	5.41407	5.39947	1.0105	10.5023	10.4476	1.00574	5.74116	-116.856	-78.2776	0.2	1.00355
	2021-06-14 18:00:00	29.03	25.6685	34.9358	1.40748	3.30863	0.0326537	42.5396	0.021	3.85	0.0208861	0.9961	-3.89963	-3.90725	0.992572	-7.42815	-7.45588	0.951449	-48.5514	29.4507	10.8738	0.991624	-8.37635	-8.41163	0.98413	-15.87	-15.9973	0.891872	-108.128	34.9295	18.8318	1.00492	1.00932	1.07862	1.0144	1.02795	1.02495	1.00737	7.36634	7.33934	1.01429	14.2859	14.1848	1.01363	13.6267	-150.247	-100.66	0.2	1.00511
	2021-06-14 19:00:00	26.1258	23.7064	39.6308	1.34723	2.94256	0.0290409	45.7843	0.019	3.85	0.0189067	0.9961	-3.89963	-3.90725	0.992572	-7.42815	-7.45588	0.951449	-48.5514	29.4507	10.8738	0.991869	-8.13054	-8.16377	0.9846	-15.4	-15.5198	0.893702	-106.298	30.6901	16.9019	1.005	1.00948	1.08078	1.0144	1.02795	1.02496	1.00695	6.95232	6.92826	1.01348	13.4826	13.3925	1.01365	13.6458	-142.977	-94.2148	0.2	1.00478
	2021-06-14 20:00:00	23.6379	21.9461	41.7638	1.22386	2.6448	0.0261022	46.2743	0.018	3.85	0.0179162	0.9961	-3.89963	-3.90725	0.992572	-7.42815	-7.45588	0.951449	-48.5514	29.4507	10.8738	0.991527	-8.47256	-8.50865	0.98396	-16.04	-16.17	0.889232	-110.768	29.1263	17.5524	1.00508	1.00963	1.08277	1.0144	1.02796	1.02496	1.00678	6.78024	6.75736	1.01316	13.1562	13.0704	1.01284	12.8434	-143.814	-92.4061	0.2	1.00464
	2021-06-14 21:00:00	22.5283	20.7602	36.2517	0.993374	2.45938	0.0242722	40.3912	0.02	3.85	0.0198966	0.9961	-3.89963	-3.90725	0.992572	-7.42815	-7.45588	0.951449	-48.5514	29.4507	10.8738	0.991219	-8.78118	-8.81996	0.98338	-16.62	-16.7597	0.884885	-115.115	29.1403	17.845	1.00513	1.00973	1.08414	1.0144	1.02795	1.02496	1.00783	7.82523	7.79477	1.01518	15.1779	15.0639	1.0177	17.7014	-158.957	-103.722	0.2	1.00548
	2021-06-14 22:00:00	21.2625	19.763	41.6633	1.05678	2.31239	0.0228215	45.7008	0.016	3.85	0.0159338	0.9961	-3.89963	-3.90725	0.992572	-7.42815	-7.45588	0.951449	-48.5514	29.4507	10.8738	0.991459	-8.54097	-8.57765	0.98383	-16.17	-16.3022	0.885406	-114.594	29.8889	14.7664	1.00518	1.00981	1.08531	1.0144	1.02796	1.02497	1.00696	6.95766	6.93357	1.0135	13.4967	13.4064	1.01386	13.8588	-145.034	-94.1148	0.2	1.00479
	2021-06-14 23:00:00	19.7642	18.7478	50.8233	1.17532	2.17072	0.0214233	54.1444	0.017	3.85	0.0169253	0.9961	-3.89963	-3.90725	0.992572	-7.42815	-7.45588	0.951449	-48.5514	29.4507	10.8738	0.991862	-8.13838	-8.17168	0.98459	-15.41	-15.53	0.888104	-111.896	28.1416	11.3844	1.00523	1.0099	1.08652	1.0144	1.02796	1.02496	1.00561	5.61122	5.59554	1.01089	10.8877	10.8289	1.00834	8.33538	-122.112	-78.7665	0.2	1.00371
	2021-06-15	16.6079	16.669	64.7121	1.22744	1.90415	0.0187925	64.4612	0.014	3.85	0.0139493	0.9961	-3.89963	-3.90725	0.992572	-7.42815	-7.45588	0.951449	-48.5514	29.4507	10.8738	0.992359	-7.64101	-7.67035	0.98554	-14.46	-14.5656	0.892005	-107.995	20.267	7.68533	1.00532	1.01009	1.08905	1.0144	1.02797	1.02497	1.0041	4.10428	4.09588	1.00797	7.96913	7.93755	1.00364	3.6371	-95.1404	-60.116	0.2	1.0025
	2021-06-15 01:00:00	15.6458	16.327	74.3667	1.32657	1.86315	0.0183879	71.2004	0.028	3.85	0.0277978	0.9961	-3.89963	-3.90725	0.992572	-7.42815	-7.45588	0.951449	-48.5514	29.4507	10.8738	0.993054	-6.94598	-6.97022	0.98687	-13.13	-13.217	0.897616	-102.384	8.33528	2.65644	1.00534	1.01012	1.08947	1.01439	1.02793	1.02494	1.00339	3.38731	3.38159	1.00658	6.57816	6.55662	1.00226	2.26198	-80.309	-50.3633	0.2	1.00193
	2021-06-15 02:00:00	15.8646	16.5436	92.1542	1.66705	1.88902	0.0186432	88.2493	0.038	3.85	0.0376286	0.9961	-3.89963	-3.90725	0.992572	-7.42815	-7.45588	0.951449	-48.5514	29.4507	10.8738	0.993656	-6.3436	-6.36381	0.98803	-11.97	-12.0422	0.903041	-96.9593	-5.52005	-1.19935	1.00533	1.0101	1.0892	1.01437	1.02791	1.02492	1.00093	0.931734	0.931301	1.00183	1.83365	1.83197	0.992824	-7.17637	-35.9813	-21.8456	0.2	0.999965
	2021-06-15 03:00:00	15.27	16.0356	95.3875	1.66103	1.82885	0.0180493	90.8236	0.006	3.85	0.00599066	0.9961	-3.89963	-3.90725	0.992572	-7.42815	-7.45588	0.951449	-48.5514	29.4507	10.8738	0.993673	-6.32658	-6.34668	0.98807	-11.93	-12.0017	0.903092	-96.9083	-9.76508	-1.46828	1.00535	1.01014	1.08983	1.01441	1.02799	1.02499	1.00054	0.540985	0.540839	1.00108	1.08424	1.08365	0.991432	-8.56786	-31.3277	-17.2418	0.2	0.999653
	2021-06-15 04:00:00	14.8554	15.9011	98.0625	1.66266	1.81321	0.017895	91.6971	0.005	3.85	0.00499351	0.9961	-3.89963	-3.90725	0.992572	-7.42815	-7.45588	0.951449	-48.5514	29.4507	10.8738	0.993736	-6.2641	-6.2838	0.98819	-11.81	-11.8803	0.903215	-96.7852	-11.0066	-2.30517	1.00536	1.01016	1.09	1.01442	1.02799	1.02499	1.00046	0.457646	0.457542	1.00092	0.92279	0.922364	0.991021	-8.97888	-29.4668	-16.3612	0.2	0.999586
	2021-06-15 05:00:00	14.5721	15.8661	97.1958	1.61812	1.80915	0.017855	89.4408	0.03	3.85	0.029768	0.9961	-3.89963	-3.90725	0.992572	-7.42815	-7.45588	0.951449	-48.5514	29.4507	10.8738	0.994072	-5.92789	-5.94553	0.98882	-11.18	-11.243	0.9062	-93.8005	-9.24541	-4.36048	1.00536	1.01016	1.09004	1.01438	1.02793	1.02494	1.00114	1.13769	1.13705	1.00222	2.22174	2.21927	0.995736	-4.26408	-34.7296	-22.038	0.2	1.00013
	2021-06-15 06:00:00	16.7067	17.7101	95.6708	1.82608	2.03382	0.0200722	89.7856	0.109	3.85	0.105999	0.9961	-3.89963	-3.90725	0.992572	-7.42815	-7.45588	0.951449	-48.5514	29.4507	10.8738	0.994237	-5.76254	-5.77921	0.98913	-10.87	-10.9295	0.910965	-89.0352	-8.43084	-2.07524	1.00527	1.00999	1.08777	1.01429	1.02774	1.02477	1.00113	1.13418	1.13354	1.00221	2.21085	2.20841	0.998038	-1.96206	-32.5037	-19.6489	0.2	1.00013
	2021-06-15 07:00:00	20.9513	20.9156	81.6817	2.03263	2.48301	0.0245054	81.8614	0.106	3.85	0.10316	0.9961	-3.89963	-3.90725	0.992572	-7.42815	-7.45588	0.951449	-48.5514	29.4507	10.8738	0.993743	-6.2567	-6.27635	0.98816	-11.84	-11.9107	0.912978	-87.0216	12.4727	7.69841	1.00513	1.00972	1.08396	1.01429	1.02775	1.02477	1.00186	1.86419	1.86246	1.00361	3.61245	3.60595	1.00183	1.8308	-41.48	-27.0688	0.2	1.00071
	2021-06-15 08:00:00	23.6117	22.7774	71.025	2.07807	2.78195	0.0274557	74.6981	0.07	3.85	0.06875	0.9961	-3.89963	-3.90725	0.992572	-7.42815	-7.45588	0.951449	-48.5514	29.4507	10.8738	0.993596	-6.40365	-6.42424	0.98786	-12.14	-12.2143	0.913427	-86.5733	24.908	10.5467	1.00504	1.00956	1.08182	1.01434	1.02783	1.02485	1.00288	2.87673	2.8726	1.00556	5.56175	5.54634	1.00505	5.04642	-55.8669	-39.4476	0.2	1.00152
	2021-06-15 09:00:00	25.5654	24.1005	67.5108	2.22006	3.0131	0.029737	73.6802	0.07	3.85	0.06875	0.9961	-3.89963	-3.90725	0.992572	-7.42815	-7.45588	0.951449	-48.5514	29.4507	10.8738	0.993618	-6.38174	-6.40219	0.9879	-12.1	-12.1738	0.914631	-85.3692	25.5722	11.4308	1.00499	1.00945	1.08034	1.01434	1.02783	1.02485	1.00301	3.00678	3.00227	1.00581	5.8141	5.79726	1.0053	5.30398	-58.6869	-41.2088	0.2	1.00163
	2021-06-15 10:00:00	27.28	25.0145	65.2721	2.37489	3.18242	0.031408	74.6253	0.081	3.85	0.079331	0.9961	-3.89963	-3.90725	0.992572	-7.42815	-7.45588	0.951449	-48.5514	29.4507	10.8738	0.993628	-6.37176	-6.39215	0.98792	-12.08	-12.1536	0.915366	-84.6344	24.9309	12.0056	1.00495	1.00937	1.07933	1.01432	1.02781	1.02483	1.00281	2.81219	2.80825	1.00544	5.43959	5.42485	1.00433	4.33379	-56.0722	-39.1829	0.2	1.00147
	2021-06-15 11:00:00	28.3433	25.1817	59.2017	2.29196	3.21428	0.0317225	71.3057	0.119	3.85	0.115432	0.9961	-3.89963	-3.90725	0.992572	-7.42815	-7.45588	0.951449	-48.5514	29.4507	10.8738	0.993459	-6.54108	-6.56256	0.9876	-12.4	-12.4775	0.91417	-85.8302	25.5684	13.3698	1.00494	1.00936	1.07915	1.01428	1.02772	1.02475	1.00323	3.22908	3.22388	1.00625	6.25088	6.23142	1.00536	5.35862	-66.3104	-44.6484	0.2	1.0018
	2021-06-15 12:00:00	28.5575	26.1938	55.4304	2.17284	3.41315	0.0336852	63.6608	0.105	3.85	0.102212	0.9961	-3.89963	-3.90725	0.992572	-7.42815	-7.45588	0.951449	-48.5514	29.4507	10.8738	0.993365	-6.63528	-6.65739	0.98742	-12.58	-12.6598	0.913426	-86.5743	26.9863	14.0657	1.0049	1.00928	1.07805	1.01429	1.02775	1.02478	1.00443	4.42703	4.41726	1.00857	8.57134	8.53482	1.00885	8.84645	-89.125	-59.7243	0.2	1.00276
	2021-06-15 13:00:00	29.9713	27.4301	49.7783	2.11729	3.67057	0.0362257	57.6828	0.095	3.85	0.0927123	0.9961	-3.89963	-3.90725	0.992572	-7.42815	-7.45588	0.951449	-48.5514	29.4507	10.8738	0.993315	-6.68492	-6.70736	0.98732	-12.68	-12.7611	0.91274	-87.2603	30.4851	14.1797	1.00484	1.00918	1.07672	1.01431	1.02777	1.0248	1.00537	5.37056	5.35619	1.0104	10.3962	10.3425	1.01116	11.1557	-104.645	-72.0136	0.2	1.00352
	2021-06-15 14:00:00	30.5475	27.3793	44.4996	1.95633	3.65968	0.0361182	53.4563	0.113	3.85	0.109778	0.9961	-3.89963	-3.90725	0.992572	-7.42815	-7.45588	0.951449	-48.5514	29.4507	10.8738	0.993504	-6.49617	-6.51736	0.98768	-12.32	-12.3965	0.913771	-86.2294	27.9996	12.3306	1.00485	1.00918	1.07678	1.01428	1.02773	1.02476	1.00619	6.1876	6.16854	1.01197	11.9748	11.9037	1.01462	14.6173	-116.592	-81.181	0.2	1.00417
	2021-06-15 15:00:00	29.0463	26.0855	52.6054	2.12135	3.39136	0.0334701	62.5514	0.11	3.85	0.106944	0.9961	-3.89963	-3.90725	0.992572	-7.42815	-7.45588	0.951449	-48.5514	29.4507	10.8738	0.993961	-6.03857	-6.05687	0.98856	-11.44	-11.5059	0.917613	-82.3867	18.2616	9.13331	1.0049	1.00929	1.07816	1.01429	1.02774	1.02477	1.00499	4.99372	4.98129	1.00966	9.66154	9.61517	1.01251	12.5129	-95.5181	-64.7794	0.2	1.00322
	2021-06-15 16:00:00	27.9804	26.4739	62.9279	2.38529	3.47006	0.0342468	68.7391	0.087	3.85	0.0850775	0.9961	-3.89963	-3.90725	0.992572	-7.42815	-7.45588	0.951449	-48.5514	29.4507	10.8738	0.994081	-5.91947	-5.93706	0.98879	-11.21	-11.2733	0.919588	-80.412	15.2448	9.26804	1.00488	1.00925	1.07774	1.01431	1.02779	1.02481	1.00405	4.05009	4.04191	1.00784	7.83653	7.80598	1.00977	9.76988	-79.6512	-52.9223	0.2	1.00246
	2021-06-15 17:00:00	27.4954	25.5721	63.5825	2.34278	3.28976	0.0324674	71.2144	0.096	3.85	0.0936645	0.99663	-3.36988	-3.37557	0.993572	-6.42815	-6.4489	0.959449	-40.5514	29.4507	10.8738	0.993944	-6.05587	-6.07428	0.98853	-11.47	-11.5363	0.918138	-81.8618	16.8815	9.89815	1.00492	1.00933	1.07872	1.0143	1.02777	1.0248	1.00374	3.73834	3.73137	1.00723	7.23151	7.20549	1.01063	10.6296	-73.1271	-47.2225	0.2	1.00232
	*averaged over 30 min before sampling
[truncated: 16 more columns]
